# Supplementary material for: Microstructure-regulated inverted pyramidal Si photocathodes for efficient hydrogen generation
Source: Royal Society of Chemistry journal article supplement (doi:10.1039/d2nr04706c), 2022-01-01
Supplement: d2nr04706c1.pdf [file d2nr04706c1.pdf]

## Supporting Information

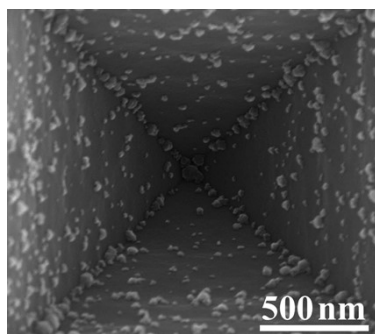

**Figure S1.** Microscopy for Cu NPs-coated sidewalls of SiIP wafers etched with Cu<sup>2+</sup> (18 mM)-containing etchant.

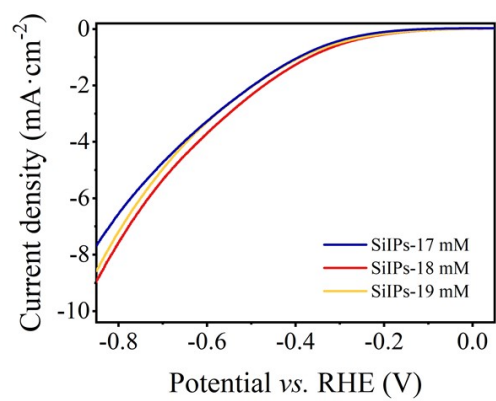

**Figure S2.** *J-V* curves for pristine SiIP photocathodes (under one sun illumination).

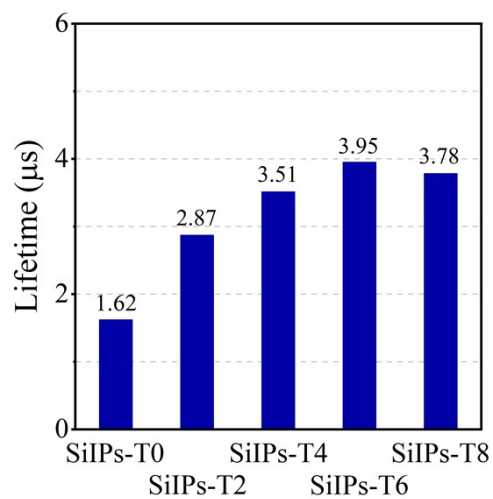

**Figure S3.** Minority carrier lifetime results for various TiO<sub>2</sub>/SiIPs/TiO<sub>2</sub> wafers.

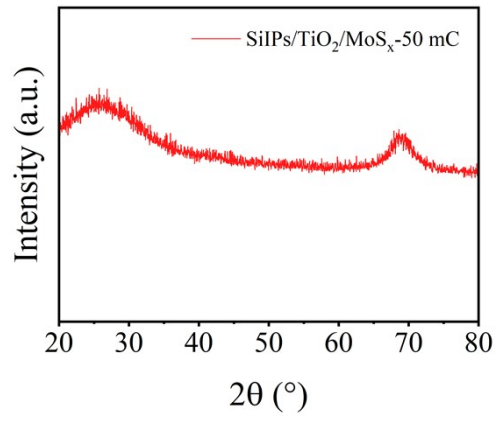

**Figure S4.** XRD patterns of SiIPs-T2/TiO<sub>2</sub>/MoS<sub>x</sub>-50 mC photocathodes.

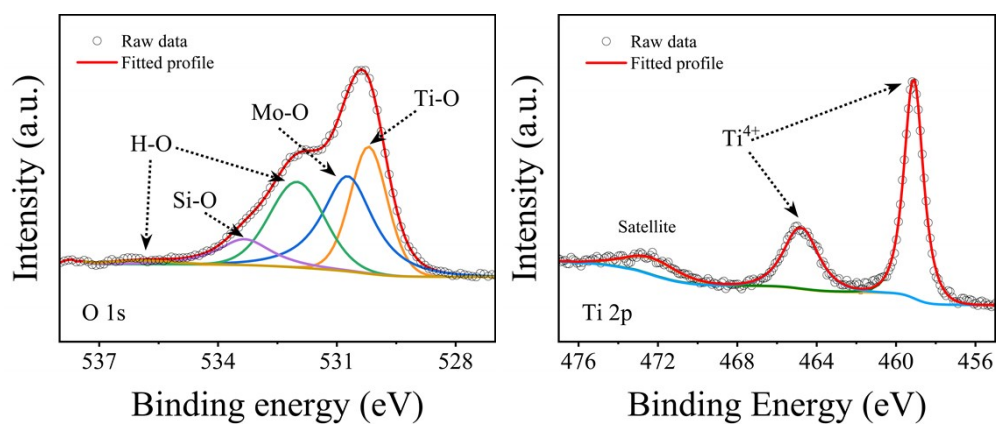

**Figure S5.** XPS spectra of SiIPs-T2/TiO<sub>2</sub>/MoS<sub>x</sub>-50 mC photocathodes in O 1s and Ti 2p regions.

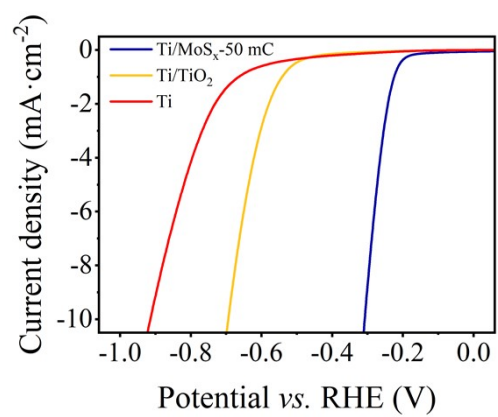

**Figure S6.** *J-V* curves for cocatalysts-coated Ti electrodes (in the dark).

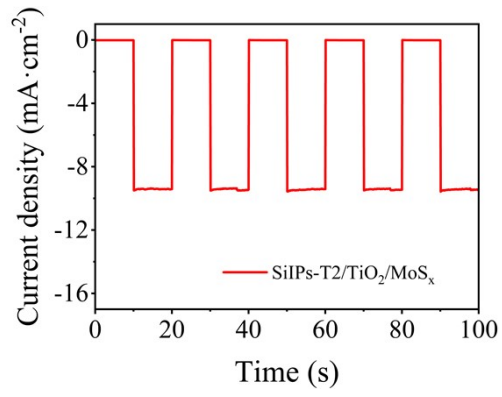

**Figure S7.** *J-t* curve for SiIPs-T2/TiO<sub>2</sub>/MoS<sub>x</sub>-50 mC photocathode (under chopped one sun illumination).

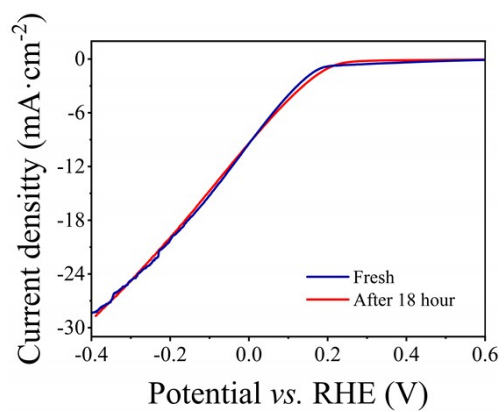

**Figure S8.** *J-V* curves comparisons for SiIPs-T2/TiO<sub>2</sub>/MoS<sub>x</sub>-50 mC cathode test before and after 18 h-long PEC catalysis.



**Table S1.** Mean reflectivity results of various (TiO<sub>2</sub>-coated) SiIP photocathodes.

| TiO <sub>2</sub> deposition | SiIPs-T0 | SiIPs-T2 | SiIPs-T4 | SiIPs-T6 | SiIPs-T8 | Planar Si |
|-----------------------------|----------|----------|----------|----------|----------|-----------|
| w/o TiO <sub>2</sub> layer  | 5.87%    | 9.59%    | 13.58%   | 13.99%   | 15.44%   | 38.74%    |
| w TiO <sub>2</sub> layer    | 3.90%    | 6.60%    | 9.00%    | 10.38%   | 12.18%   | 29.69%    |

**Table S2.** Fitting results of EIS data for various SiIP electrodes.

| Photocathode                   | $R_s$ ( $\Omega \text{ cm}^2$ ) | $R_{ct1}$ ( $\Omega \text{ cm}^2$ ) | $R_{ct2}$ ( $\Omega \text{ cm}^2$ ) | $R_{ct3}$ ( $\Omega \text{ cm}^2$ ) |
|--------------------------------|---------------------------------|-------------------------------------|-------------------------------------|-------------------------------------|
| SiIPs-T2                       | 27.69                           | N/A                                 | N/A                                 | 3109.4                              |
| SiIPs-T2/TiO <sub>2</sub>      | 17.56                           | 5.76                                | 15.37                               | 57.36                               |
| SiIPs-T2/TiO <sub>2</sub> /M.S | 17.9                            | 6.15                                | 10.72                               | 16.33                               |

EIS data are fitted using an equivalent circuit with three constant phase elements (CPEs) and four resistive components, as shown in the inset of Fig. 7b. Among them,  $R_s$  represents electrolyte resistance.  $R_{ct1}$  is interfacial charge transfer resistance at Si/TiO<sub>2</sub> interface, while  $R_{ct2}$  means the charge diffusion resistance within TiO<sub>2</sub> layer. Besides,  $R_{ct3}$  indicates interfacial charge transfer resistance at electrode/electrolyte interface, reflecting total charge transfer capability and hydrogen evolution kinetics of Si-based electrodes.

**Table S3.** Onset potential and current density data for various SiIP electrodes.

| Photocathode                                        | Onset potential<br>(V vs. RHE) | Current density<br>( mA·cm <sup>-2</sup> @0 V vs. RHE) |
|-----------------------------------------------------|--------------------------------|--------------------------------------------------------|
| SiIPs-T0                                            | -0.37                          | 0.01                                                   |
| SiIPs-T2                                            | -0.35                          | 0.03                                                   |
| SiIPs-T4                                            | -0.36                          | 0.03                                                   |
| SiIPs-T6                                            | -0.40                          | 0.03                                                   |
| SiIPs-T8                                            | -0.40                          | 0.03                                                   |
| SiIPs-T0/TiO <sub>2</sub>                           | 0.09                           | 2.08                                                   |
| SiIPs-T2/TiO <sub>2</sub>                           | 0.10                           | 2.42                                                   |
| SiIPs-T4/TiO <sub>2</sub>                           | 0.12                           | 2.57                                                   |
| SiIPs-T6/TiO <sub>2</sub>                           | 0.09                           | 2.01                                                   |
| SiIPs-T8/TiO <sub>2</sub>                           | 0.07                           | 1.75                                                   |
| SiIPs-T2/TiO <sub>2</sub> /MoS <sub>x</sub> -10 mC  | 0.18                           | 7.53                                                   |
| SiIPs-T2/TiO <sub>2</sub> /MoS <sub>x</sub> -50 mC  | 0.18                           | 9.45                                                   |
| SiIPs-T2/TiO <sub>2</sub> /MoS <sub>x</sub> -100 mC | 0.19                           | 7.35                                                   |
| SiIPs-T2/TiO <sub>2</sub> /MoS <sub>x</sub> -200 mC | 0.19                           | 6.41                                                   |

Note that we define onset potential as the specific RHE potential at which the photocurrent density reaches up to 1 mA·cm<sup>-2</sup>.
